# Supplementary material for: Structure and ion physiology of Brasenia schreberi glandular trichomes in vivo
Source: PeerJ. 2019 Jul 10;7:e7288. doi: 10.7717/peerj.7288 (PMC6802583; doi:10.7717/peerj.7288)
Supplement: Supplemental Information 1 [file peerj-07-7288-s001.xls]

## Sheet: Sheet1
					treats
sodium chloride			solutions	time	1	2	3	4	5	6
	young stage		0	10	0	0	0	0	0	0
				20	0	0	0	0	0	0
				30	0	0	0	0	0	0
	young stage		0.009	10	0.125	0.111	0.125	0.143	0.25	0.222
				20	0.444	0.5	0.375	0.5	0.556	0.375
				30	0.75	0.667	0.778	0.875	0.857	1
	young stage		0.018	10	0.625	0.5	0.778	0.7	0.8	0.857
				20	0.9	0.875	0.889	1	1	0.8
				30	1	1	0.9	1	0.857	0.889
	young stage		0.027	10	0.9	0.9	0.889	1	1	1
				20	1	1	1	1	1	1
				30	1	1	1	1	1	1
sodium chloride
	mature stage		0	10	0	0	0	0	0	0
				20	0	0	0	0	0	0
				30	0	0	0	0	0	0
	mature stage		0.009	10	0.1	0	0.143	0.2	0.111	0
				20	0.1	0	0.111	0.2	0.143	0.125
				30	0.2	0.333	0.125	0.143	0.3	0.25
	mature stage		0.018	10	0.143	0.125	0	0.111	0.1	0.125
				20	0.5	0.444	0.375	0.429	0.5	0.625
				30	0.875	0.875	1	0.889	0.875	0.857
	mature stage		0.027	10	0.375	0.5	0.444	0.6	0.571	0.75
				20	0.429	0.72	0.667	0.7	0.714	0.875
				30	0.875	0.9	1	1	0.889	0.9
ethanol	young stage		0	10	0	0	0	0	0	0
				20	0	0	0	0	0	0
				30	0	0	0	0	0	0
	young stage		0.01	10	0	0	0.1	0	0.11	0
				20	0	0.2	0.111	0	0.1	0.143
				30	0.1	0.1	0.143	0.111	0.125	0
	young stage		0.02	10	0.1	0	0.1	0.1	0.143	0.125
				20	0	0.2	0.143	0.3	0.111	0.25
				30	0.2	0.333	0.4	0.5	0.3	0.375
	young stage		0.03	10	0.125	0.25	0.222	0.111	0.143	0
				20	0.625	0.556	0.5	0.375	0.444	0.571
				30	0.875	0.778	1	0.857	0.667	0.875
	young stage		0.04	10	0.3	0.25	0.5	0.4	0.444	0.333
				20	0.5	0.6	0.75	0.8	0.875	0.889
				30	0.6	0.75	0.9	0.875	0.857	1
ethanol
	mature stage		0	10	0	0	0	0	0	0
				20	0	0	0	0	0	0
				30	0	0	0	0	0	0
	mature stage		0.01	10	0.2	0.111	0.125	0.1	0.143	0.125
				20	0.222	0.2	0.25	0.286	0.3	0.375
				30	0.5	0.333	0.3	0.777	0.286	0.375
	mature stage		0.02	10	0.222	0.25	0.125	0.111	0.375	0.125
				20	0.5	0.556	0.375	0.429	0.625	0.444
				30	1	0.875	0.778	0.75	0.667	0.714
	mature stage		0.03	10	0.6	0.7	0.778	0.857	0.667	0.625
				20	0.9	0.8	0.75	0.9	0.778	0.875
				30	1	1	0.889	1	0.9	1
	mature stage		0.04	10	1	0.9	0.8	1	0.8	1
				20	1	1	0.9	1	1	1
				30	1	0.889	1	1	1	1
